# Supplementary material
Source: PubMed Central journal article supplement (PMC9531930)
Supplement: AJSLP-31-1755-s001.pdf [file AJSLP-31-1755-s001.pdf]

**Supplemental Material S1.** Surveys completed by speech-language pathologists with questions about their demographic information and therapeutic approach toward using various components of family-centered practice.

### **Demographic Information**

#### **What is your race/ethnicity?**

- American Indian or Alaska Native
- Asian
- Black or African American
- Hispanic or Latino
- Native Hawaiian or Other Pacific Islander
- White
- Other
- Prefer not to answer

#### **What best describes your gender?**

- Female
- Male
- Prefer not to say
- Prefer to self-describe

#### **For how many years have you worked in Early Intervention (including CFY)?**

- < 1 year
- 1-2 years
- 3-5 years
- 6-10 years
- 11-20 years
- More than 20 years

### **Therapeutic Approach**

#### **Based on the following definitions, how would you categorize this session?**

- Direct interaction with the child, using an activity and materials you created.
- Facilitation of child participation within naturally occurring activities.

#### **How would you describe the majority of your therapy sessions?**

- Direct interaction with the child, using an activity and materials you created.
- Facilitation of child participation within naturally occurring activities.

#### **Currently, in the majority of my sessions...**

- I interact with the child and the caregiver observes or is not present.
- I interact with the child and give the caregiver tips/homework at the end
- I interact with the child and point out the strategies to the caregiver as I'm doing them
- The caregiver conducts the session while I coach them

- I interact with the child while pointing out strategies, and then the caregiver interacts while I coach them

**Ideally, during my sessions...**

- I would interact with the child while the caregiver observes or is not present.
- I would interact with the child and give the caregiver tips/homework at the end
- I would interact with the child and point out the strategies to the caregiver as I'm doing them
- The caregiver would conduct the session while I coach them
- I would interact with the child while pointing out strategies, and then the caregiver interacts while I coach them

**What barriers do you (or would you expect to) face in using a caregiver-implemented therapy model? (check all that apply)**

- I'm not comfortable coaching parents.
- I'm not confident in what strategies to teach parents.
- The parent is not comfortable being coached.
- It's too challenging to add in parent training to the sessions of children on my caseload.
- The parent prefers that I, as the specialist, work directly with the child.
- The child works better with me.
- The child needs specialized instruction that the parent can't provide.
- The parent is not available during sessions.
- The parent has said they prefer to use the therapy time as a break.
- I feel the parent needs to use the therapy time as a break.
- The parent wants to use the session time to discuss other concerns about their child.
- This therapy model is not supported or encouraged by my workplace.
- The child's other providers are not using the approach.
- None
- Other

**Currently, in the majority of my sessions...**

- I bring a full toy bag with me
- I bring a few toys but not a full bag
- I'm mostly bagless but bring toys occasionally/for a few of my clients
- I'm fully bagless and conduct my sessions during play
- I'm fully bagless and conduct my sessions during family routines
- I'm fully bagless and conduct my sessions during a combination of play and family routines

**Ideally, during my sessions ...**

- I would bring a full toy bag with me
- I would bring a few toys but not a full bag
- I would be mostly bagless but bring toys occasionally/ for a few of my clients
- I would be fully bagless and conduct my sessions during play
- I would be fully bagless and conduct my sessions during family routines

- I would be fully bagless and conduct my sessions during a combination of play and family routines

**What barriers do you (or would you expect to) face using a bagless therapy approach? (check all that apply)**

- The child makes more progress if I bring novel toys
- Families do not have appropriate toys or materials
- I like to plan which toys we will play with in advance of my session
- Parents expect/prefer me to bring toys with me
- I do not feel adequately trained to implement a bagless model
- None
- Other

**What barriers do you (or would you expect to) face when conducting therapy during family routines? (check all that apply)**

- The child makes more progress if we do therapy during play
- Families do not do age-appropriate activities with their children
- I like to plan which activities we will do in advance of my session
- Families expect/want me to work on skills within play
- Families are not comfortable doing daily activities with me
- It's too difficult to schedule sessions around the families daily routines
- I do not feel adequately trained to implement therapy during family routines
- It feels uncomfortable conducting therapy during daily activities
- None
- Other
